# Supplementary figures and images for: Hydrothermal growth of piezoelectrically active lead-free (Na,K)NbO3–LiTaO3thin films
Source: Royal Society of Chemistry journal article supplement (doi:10.1039/c2ce26311d), 2012-09-20

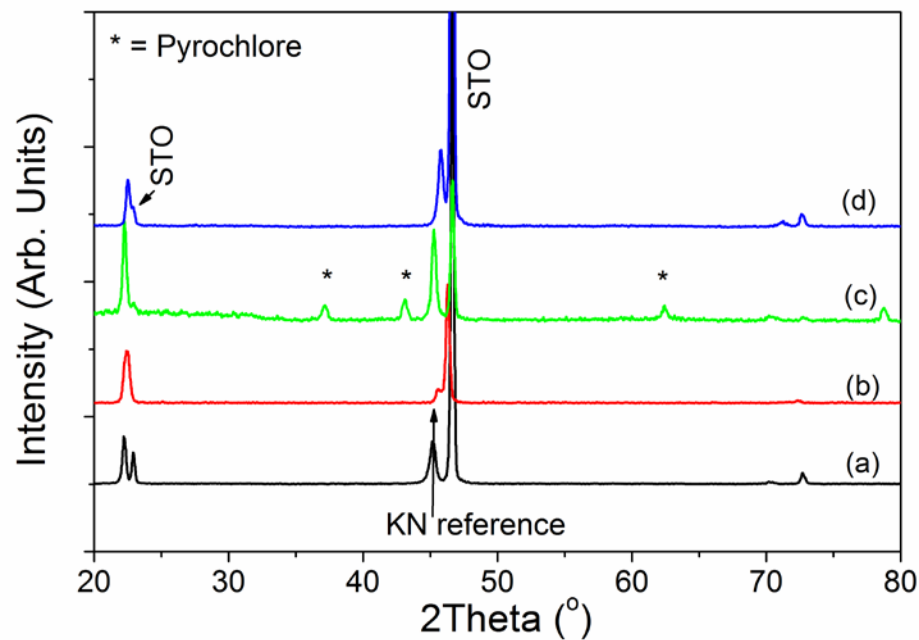

Supporting Figure 1: Full XRD scan range of manuscript Fig. 2 (a)

Supplement: c2ce26311d.pdf [file c2ce26311d.pdf]
